# Supplementary material for: C2-Phytoceramide Perturbs Lipid Rafts and Cell Integrity in Saccharomyces cerevisiae in a Sterol-Dependent Manner
Source: PubMed Central journal article supplement (PMC3770674; doi:10.1371/journal.pone.0074240), 2013-09-11

**A**

| Time (min.) | Single staining FITC (%) |        | Single staining PI (%) |        | Double staining FITC/PI (%) |        |
|-------------|--------------------------|--------|------------------------|--------|-----------------------------|--------|
|             | DMSO                     | C2-PHY | DMSO                   | C2-PHY | DMSO                        | C2-PHY |
| 0           | 1.44                     | 1.44   | 0.13                   | 0.13   | 0.67                        | 0.67   |
| 60          | 0.63                     | 2.13   | 1.17                   | 3.44   | 0.70                        | 3.92   |

**B**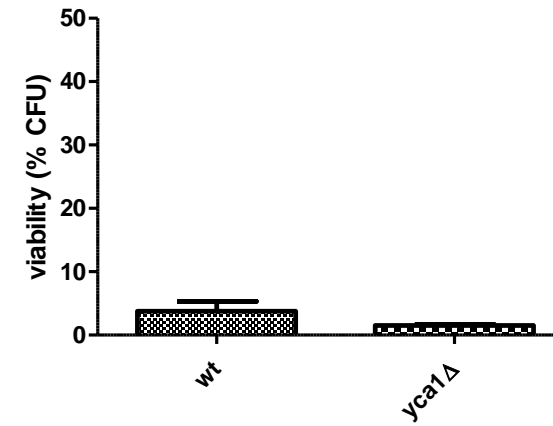

Supplement: pone.0074240.s006.pdf [file pone.0074240.s006.pdf]
