# Supplementary material for: C2-Phytoceramide Perturbs Lipid Rafts and Cell Integrity in Saccharomyces cerevisiae in a Sterol-Dependent Manner
Source: PubMed Central journal article supplement (PMC3770674; doi:10.1371/journal.pone.0074240), 2013-09-11

C2-phy

DMSO

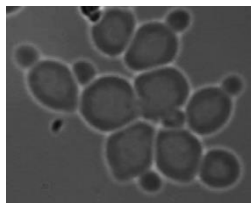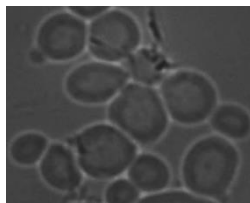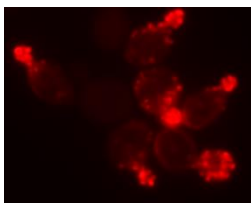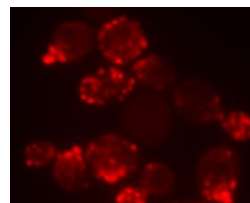

Supplement: pone.0074240.s008.pdf [file pone.0074240.s008.pdf]
